# Supplementary material
Source: publisher figshare collection journal article supplement (https://geolsoc.figshare.com/ndownloader/files/27913721)
Supplement: Supplementary file 1 [file 27913721]

Sample name	Grain number	Cl (ppm)	Cl 2SE	U (ppm)	U 2SE	Tracks	Area (cm2)	Density (tracks/cm2)	Average Dpar (�m)	Grain age	Grain age uncertainty (1sigma)
TA01	1	4950	450	12.46	0.99	49	2.90E-05	1687000	2.09	279.3	48.7
TA01	2	5050	520	11.9	1.1	12	7.58E-06	1583000	1.86	274.4	84.8
TA01	3	2260	260	6.68	0.51	5	8.77E-06	570500	1.75	176.2	80.6
TA01	4	4160	420	16.1	2	36	2.57E-05	1400000	1.92	179.4	38.8
TA01	5	4000	390	14.6	1	14	9.65E-06	1451000	1.92	205	57.9
TA01	6	2470	340	7.23	0.56	14	2.09E-05	670900	1.75	191.4	54.5
TA01	7	4230	410	13.39	0.96	42	4.12E-05	1021000	1.81	157.3	28.4
TA01	8	3990	520	16.2	1.7	35	2.75E-05	1274000	1.92	162.2	33.7
TA01	9	3140	310	16.1	1.2	47	2.30E-05	2047000	1.91	262.3	45.8
TA01	10	5160	470	11.47	0.61	19	1.62E-05	1174000	1.77	211.1	51.3
TA01	11	4840	410	17.9	1.1	28	1.64E-05	1703000	2.08	196.2	40.8
TA01	12	3530	580	16.5	1.3	38	1.81E-05	2099000	1.9	262.4	49.9
TA01	13	3400	460	28.7	1.9	25	1.24E-05	2014000	1.73	144.7	31.7
TA01	14	4480	320	13.78	0.87	13	1.35E-05	963800	2.09	144.3	42
TA01	16	4360	480	11.85	0.69	21	1.54E-05	1363000	1.93	237.2	55.5
TA01	17	4470	380	10.07	0.64	28	2.30E-05	1217000	1.99	249.3	51.9
TA01	18	4500	450	12.03	0.65	26	1.87E-05	1393000	1.84	238.8	50.7
TA01	19	4550	450	14.32	0.87	41	2.43E-05	1687000	1.91	243	43.3
TA01	20	4110	430	19.1	1.2	16	1.19E-05	1346000	1.93	145.4	38.5
TA01	21	4710	450	8.39	0.58	24	1.82E-05	1322000	2.08	325	72.7
TA01	23	3940	400	17.1	1	43	2.09E-05	2060000	1.97	248.5	43.3
TA01	24	4210	540	11.05	0.87	17	1.78E-05	956600	1.72	178.6	46.8
TA01	25	3570	730	10.3	0.84	11	1.59E-05	690000	1.67	138.2	44
TA01	26	4290	390	17.49	0.65	20	1.90E-05	1052000	1.96	124.1	29.1
TA01	27	4990	500	13	1.1	24	1.49E-05	1615000	1.81	256.2	58.7
TA01	28	4980	400	14.92	0.93	27	1.64E-05	1649000	1.98	228	48.1
TA01	29	4460	820	13.1	1.3	12	1.18E-05	1019000	1.81	160.4	49.9
TA01	31	4550	480	11.18	0.81	31	2.27E-05	1367000	1.81	252.2	51.2
TA01	32	4180	430	16.4	1.6	18	1.46E-05	1230000	1.79	154.7	40.6
TA01	33	4880	540	16.7	1.3	33	1.53E-05	2163000	2.08	267.2	53.4
TA01	34	4310	390	12.32	0.71	20	1.98E-05	1008000	1.97	168.8	40.3
TA01	35	4230	380	21.6	1.6	23	1.41E-05	1633000	1.88	155.9	35.8
TA01	36	4290	400	15.6	1.2	26	2.24E-05	1161000	2.01	153.5	33.6
TA01	37	3630	340	13.32	0.85	25	1.73E-05	1443000	1.78	223.5	48.8
TA01	38	3980	360	12.57	0.92	18	1.78E-05	1010000	1.85	165.7	42.1
TA01	39	4650	630	12.7	1.3	23	1.42E-05	1616000	2.05	262.5	63
TA01	40	4410	420	11.62	0.61	21	2.44E-05	861300	1.76	152.9	35.5
TA02	1	4180	430	4.06	0.3	4	1.34E-05	298100	1.59	151.4	77.1
TA02	2	2870	380	8.11	0.45	12	2.73E-05	439600	1.8	111.8	33.6
TA02	3	3250	540	4.35	0.82	5	1.75E-05	285200	1.5	135.2	66.1
TA02	5	5060	560	2.13	0.16	3	1.84E-05	163300	2.58	158.1	92.6
TA02	6	4940	550	1.91	0.15	10	2.05E-05	488900	2.07	528	175
TA02	7	4190	590	1.85	0.14	3	1.24E-05	241200	2.06	268.9	157.4
TA02	8	4610	420	2.83	0.26	3	1.09E-05	276000	2.39	201.2	118.2
TA02	9	5280	360	2.12	0.13	7	1.39E-05	505300	1.68	491.6	190.6
TA02	10	5230	510	1.94	0.14	3	1.15E-05	260100	2.08	276.5	161.8
TA02	11	3600	420	12.29	0.6	13	9.35E-06	1391000	2.35	233.5	67.2
TA02	12	6050	450	2.76	0.24	4	1.24E-05	321500	1.92	240.3	122.8
TA02	13	5350	490	2.13	0.19	6	1.26E-05	475000	2.2	460	194.2
TA02	14	3160	660	2.92	0.58	3	1.72E-05	174800	1.59	123.5	75.8
TA02	15	3040	300	2.46	0.18	8	1.57E-05	508400	2.14	426.3	156.1
TA02	16	no value	NaN	2.9	0.3	8	1.54E-05	518400	2.4	368.7	137.6
TA02	17	5180	540	3.32	0.24	3	1.04E-05	287500	1.96	178.6	104.5
TA02	18	6500	580	2.22	0.19	3	1.22E-05	245500	1.98	228.1	133.8
TA02	19	2450	500	2.06	0.16	3	1.15E-05	260500	2.1	260.8	152.8
TA02	20	5800	570	3.39	0.31	8	1.52E-05	526600	2.32	320.4	118.6
TA02	21	5110	790	3.13	0.27	4	1.01E-05	396300	2.22	261.2	133.4
TA04	1	1170	370	4.73	0.31	3	1.35E-05	222700	1.88	97.1	56.7
TA04	2	1470	340	4.28	0.21	2	9.14E-06	218800	1.5	105.4	75
TA04	4	1270	290	3.68	0.22	5	9.59E-06	521500	1.8	292.3	133.1
TA04	5	1280	340	4	0.33	7	1.37E-05	512200	1.55	264.1	103.4
TA04	6	970	320	3.94	0.25	5	1.05E-05	476900	1.43	249.7	113.8
TA04	8	1480	360	4.83	0.39	3	9.53E-06	314700	1.46	134.4	78.8
TA04	9	1030	260	4.94	0.4	9	1.89E-05	476900	1.63	199.1	69.4
TA04	10	1180	300	8.61	0.7	7	1.02E-05	684700	1.38	164	64.2
TA04	11	Below LOD	Below LOD	5.88	0.43	10	9.32E-06	1073000	1.63	376.4	124.3
TA04	12	6200	1200	5.6	0.47	3	7.96E-06	377000	1.7	138.9	81.4
TA04	13	1360	280	6.62	0.41	8	7.91E-06	1011000	2.22	315	114.7
TA04	14	3180	500	3.83	0.28	5	1.41E-05	355200	1.88	191.3	87.5
TA04	15	8090	590	5.47	0.52	12	1.17E-05	1022000	2.09	385.4	119.4
TA04	16	7100	590	4.11	0.41	3	1.28E-05	235100	2.74	118	69.5
TA04	17	3270	360	3.07	0.24	6	1.05E-05	574100	1.77	385.7	162
TA04	18	860	340	6.49	0.44	6	9.39E-06	639100	2.1	203.1	85
TA04	21	2900	1800	3.92	0.43	2	1.01E-05	198400	2.25	104.4	75
TA04	22	1230	390	3.62	0.29	5	1.06E-05	472600	1.68	269.3	123.4
TA04	23	no value	NaN	4.11	0.26	2	7.61E-06	262900	2.06	131.9	94
TA04	24	1270	410	4.12	0.35	3	8.90E-06	337200	1.96	168.8	99
TA04	26	1250	400	4.8	0.55	1	1.27E-05	78610	1.94	33.8	34.1
TA04	27	1180	410	3.76	0.22	3	1.33E-05	224900	1.31	123.4	72
TA04	28	900	310	4.43	0.27	4	1.52E-05	262700	1.28	122.3	62.1
TA04	29	1110	400	4.64	0.27	2	1.04E-05	191600	1.69	85.2	60.6
TA04	30	1110	310	4.2	0.29	5	1.17E-05	427100	1.68	209.8	95.8
TA05	1	1020	590	7.8	1.4	5	1.45E-05	344400	1.61	91.1	44.2
TA05	2	480	320	9.02	0.67	29	3.45E-05	841000	1.59	192.3	40.2
TA05	3	1260	250	6.3	0.36	4	1.14E-05	352000	1.29	115.2	58.4
TA05	4	1950	250	3.56	0.24	4	2.00E-05	199700	1.71	115.7	58.8
TA06	1	850	290	9.95	0.67	9	1.88E-05	478500	1.6	99.2	34.3
TA06	2	610	300	13.6	2	25	3.66E-05	682800	1.51	103.6	26.5
TA06	3	Below LOD	Below LOD	10.65	0.76	13	1.42E-05	913000	1.71	176.8	51.8
TA06	4	510	230	10.42	0.55	22	3.30E-05	666600	1.36	132	30.1
TA06	5	700	240	11.35	0.82	25	4.25E-05	588900	1.48	107	23.7
TA06	6	620	420	25.9	3.4	38	2.35E-05	1619000	1.78	128.9	28
TA06	8	670	260	8.82	0.6	16	2.47E-05	647400	1.64	151.4	40.3
TA06	9	Below LOD	Below LOD	12.85	0.81	17	1.92E-05	885500	1.58	142.1	36.6
TA06	10	660	270	5.88	0.38	14	3.51E-05	398900	1.8	139.9	39.4
TA06	11	750	310	10.03	0.87	23	3.46E-05	665200	1.48	136.8	32
TA06	12	710	410	5.92	0.49	13	3.23E-05	402000	2.01	140.1	41.4
TA06	13	550	250	4.48	0.26	5	2.11E-05	236600	2.33	108.9	49.6
TA06	14	690	320	9.76	0.76	8	1.86E-05	429400	1.75	90.7	33.3
TA06	15	1680	320	10.34	0.7	22	5.33E-05	412400	2.03	82.3	19.1
TA06	16	1260	270	8.06	0.58	24	3.84E-05	624900	1.83	159.9	35.9
TA06	17	490	270	2.12	0.19	5	2.74E-05	182500	1.73	177.6	81.7
TA06	18	570	230	11	1	12	1.96E-05	612600	1.94	114.9	35.5
TA06	19	700	210	9.66	0.63	11	1.46E-05	755400	1.46	161.3	50.7
TA06	20	870	240	10.42	0.68	12	1.49E-05	806500	1.45	159.6	48.2
TA06	21	Below LOD	Below LOD	10.96	0.88	12	2.06E-05	583100	1.71	109.7	33.5
TA06	23	720	360	10.7	0.61	23	4.14E-05	555900	1.63	107.2	24.1
TA06	24	710	300	9.62	0.54	7	1.45E-05	484000	1.87	103.8	40.1
TA06	25	640	480	10.1	1.3	17	2.92E-05	581800	1.89	118.8	33.4
TA06	26	500	270	10.38	0.77	15	1.85E-05	811200	1.67	161.2	44.4
TA06	27	580	250	11.15	0.54	29	2.02E-05	1433000	1.76	265.1	53.3
TA06	28	Below LOD	Below LOD	10.68	0.7	13	1.43E-05	907300	1.73	175.2	51
TA06	29	680	280	12.54	0.85	27	4.16E-05	648600	1.68	106.7	22.7
TA06	30	740	250	11.92	0.71	16	1.67E-05	959700	1.69	166.1	43.8
TA06	31	590	280	11.34	0.72	16	2.05E-05	781400	1.75	142.1	37.7
TA06	32	780	280	10.02	0.64	10	1.86E-05	539200	1.71	111	36.4
TA06	33	580	240	9.43	0.65	14	1.81E-05	774800	1.61	169.5	47.9
TA06	34	2900	1400	9.54	0.89	7	1.80E-05	388900	1.6	84.1	33.1
TA06	35	660	220	11.5	0.81	10	1.76E-05	569800	1.74	102.2	33.7
TA06	36	790	380	10	0.96	8	1.84E-05	435000	1.57	89.7	33.3
TA06	37	Below LOD	Below LOD	9.27	0.54	27	4.76E-05	567400	1.65	126.3	26.5
TA06	38	Below LOD	Below LOD	11.53	0.88	18	2.50E-05	720900	1.67	129	32.9
TA06	39	870	270	9.16	0.46	23	3.46E-05	665700	1.64	149.9	33.4
TA06	40	Below LOD	Below LOD	8.86	0.59	18	2.93E-05	615200	1.42	143.2	36.1
TA07	1	1550	340	3.42	0.23	5	1.54E-05	325200	1.29	196.1	89.5
TA07	2	910	340	6.26	0.51	14	1.58E-05	884500	1.77	291.4	83.3
TA07	3	1200	280	8.9	0.55	14	1.60E-05	877300	1.74	203.3	57.1
TA07	4	1090	420	5.07	0.41	5	2.27E-05	220800	1.33	89.8	41.2
TA07	5	1870	320	3.26	0.19	9	2.87E-05	313200	1.8	198.2	68.1
TA07	6	990	240	4.95	0.3	13	2.64E-05	492100	1.41	205.1	59.5
TA07	7	1070	330	5.85	0.27	23	2.48E-05	926800	1.66	326.8	72.5
TA07	8	1160	250	3.92	0.27	10	2.15E-05	465300	1.3	244.8	80.6
TA07	9	1100	300	6.79	0.44	16	2.09E-05	766700	1.3	232.9	61.8
TA07	10	990	250	6.32	0.35	14	2.21E-05	632500	1.62	206.4	57.7
TA07	11	2480	410	3.67	0.27	2	1.91E-05	104600	1.69	58.8	41.9
TA07	12	1130	250	5.13	0.39	12	1.99E-05	602000	1.01	242	73.7
TA07	13	850	300	5.84	0.4	14	2.40E-05	583700	1.19	206.2	58.2
TA07	15	1580	280	4.79	0.32	8	2.26E-05	354300	1.59	152.6	55.7
TA07	16	1410	290	9.87	0.53	13	1.96E-05	663700	1.22	138.7	40.1
TA07	17	1070	350	5.83	0.49	4	2.25E-05	178100	1.16	63	32.2
TA07	18	1370	310	5.41	0.36	12	3.50E-05	343200	1.17	130.9	39.6
TA07	20	1220	250	5.39	0.34	6	1.39E-05	431600	1.23	165.2	69
TA07	21	1990	260	3.13	0.2	7	2.67E-05	261800	1.17	172.5	67
TA07	22	1350	290	5.17	0.37	9	1.25E-05	718900	1.18	286.8	99.3
TA07	23	920	260	4.13	0.26	7	2.52E-05	278000	1.17	138.8	53.9
TA07	24	1170	310	5.79	0.42	13	2.35E-05	554400	1.59	197.5	57.9
TA07	25	1760	220	2.8	0.18	9	2.33E-05	386900	1.56	285	98.3
TA07	26	1660	460	4.1	0.3	13	1.96E-05	662600	1.32	333.3	97.7
TA07	28	960	250	3.77	0.29	6	1.85E-05	325100	1.14	177.9	74.7
TA07	29	1080	280	3.72	0.3	9	2.56E-05	351300	1.82	194.8	67.8
TA07	31	1200	260	3.91	0.25	9	1.85E-05	486000	1.56	256.4	88.4
TA07	32	970	320	3.25	0.23	13	2.41E-05	539000	1.86	342.1	100.1
TA07	34	1250	300	3.28	0.24	8	2.87E-05	278300	1.93	175	64.1
TA07	35	1670	320	4.22	0.28	20	3.41E-05	586900	2.05	286.9	69.1
TA07	36	910	380	2.07	0.15	5	3.83E-05	130400	2.41	129.9	59.4
TA07	37	810	460	3.63	0.41	10	2.54E-05	394400	1.88	224.1	76.5
TA07	38	650	360	5.65	0.41	12	2.40E-05	499600	1.93	182.4	55.4
TA07	40	580	320	3.07	0.28	10	2.24E-05	446500	1.31	300	100.4
TA11	1	Below LOD	Below LOD	22.6	1.6	24	1.75E-05	1374000	1.31	125.4	28.1
TA11	2	Below LOD	Below LOD	19.8	1.4	20	1.39E-05	1442000	1.22	150.2	36.4
TA11	3	630	280	24.6	1.1	22	1.74E-05	1265000	1.45	106.1	24
TA11	5	Below LOD	Below LOD	9.98	0.9	5	1.45E-05	345400	1.34	71.4	32.9
TA11	6	870	350	9.32	0.69	10	1.29E-05	774300	1.15	171.4	56.6
TA11	7	Below LOD	Below LOD	9.45	0.47	5	1.33E-05	375900	1.16	82	37.3
TA11	8	970	330	12.23	0.98	14	1.38E-05	1013000	1.43	170.8	48.8
TA11	9	580	290	18.2	1.5	15	1.63E-05	919000	1.84	104.2	28.9
TA11	11	Below LOD	Below LOD	18.1	1.6	15	9.24E-06	1623000	1.37	185	51.7
TA11	14	Below LOD	Below LOD	12.03	0.63	14	1.77E-05	792500	1.11	135.9	37.9
TA11	16	550	260	3.29	0.26	13	4.38E-05	296900	1.18	186.1	54.8
TA11	17	560	360	116	10	74	7.92E-06	9339000	1.48	166.1	26
TA11	18	600	280	12.93	0.91	28	2.31E-05	1211000	1.26	193.2	40.7
TA11	19	660	380	20.4	2.1	32	2.14E-05	1498000	1.33	151.5	32.3
TA11	20	Below LOD	Below LOD	16.9	1	23	1.58E-05	1453000	1.29	177.3	39.9
TA11	21	590	340	20.5	1.5	22	2.31E-05	953500	1.38	95.9	22.4
TA11	23	Below LOD	Below LOD	13.21	0.67	18	1.01E-05	1779000	1.09	277.8	69
TA11	24	680	310	14.9	1.4	14	1.59E-05	878500	1.7	121.6	35.2
TA11	25	Below LOD	Below LOD	8.71	0.49	10	1.37E-05	730900	1.22	173.1	56.6
TA11	26	590	250	8.95	0.72	10	1.73E-05	578700	1.21	133.4	44.3
TA11	27	590	270	16.1	1.2	30	1.75E-05	1712000	1.21	219.3	45.2
TA11	28	Below LOD	Below LOD	12.83	0.94	19	2.27E-05	836300	1.2	134.4	33.4
TA11	29	640	340	10.5	1.3	6	1.30E-05	462200	1.1	90.8	39.1
TA11	30	Below LOD	Below LOD	24.1	2	22	1.46E-05	1512000	1.41	129.4	30.6
TA11	31	Below LOD	Below LOD	12.07	0.92	14	2.01E-05	698200	1.6	119.3	33.9
TA11	32	Below LOD	Below LOD	16.9	2.1	12	1.42E-05	848200	1.11	103.5	33.1
TA11	34	Below LOD	Below LOD	7.71	0.49	15	1.80E-05	831900	1.27	222.6	60.7
TA14	1	790	410	12.22	0.86	26	2.14E-05	1213000	1.89	204.7	44.4
TA14	2	1100	420	15.9	1	21	1.55E-05	1353000	1.74	175.5	41.2
TA14	3	940	320	14.37	0.88	37	1.95E-05	1901000	1.72	272.9	50.6
TA14	4	1210	360	7.46	0.46	20	1.97E-05	1018000	1.94	281.5	67.5
TA14	5	Below LOD	Below LOD	5.61	0.31	12	2.35E-05	509700	1.86	187.4	56.2
TA14	6	1330	300	15.5	1.1	32	1.85E-05	1734000	1.79	230.8	46.1
TA14	7	720	320	6.27	0.34	15	1.90E-05	787700	1.29	259.1	70.1
TA14	8	1380	350	15.3	1	17	1.55E-05	1097000	1.56	147.9	38.2
TA14	9	1290	380	16.2	1.3	30	1.92E-05	1562000	1.64	198.9	41.4
TA14	11	820	350	5.01	0.4	15	2.10E-05	716100	1.81	294.8	81.6
TA14	12	Below LOD	Below LOD	9.4	1	14	1.27E-05	1107000	1.91	242.9	71.4
TA14	14	970	390	20.5	1.5	29	1.88E-05	1544000	1.95	155.4	32.4
TA14	15	Below LOD	Below LOD	21	1.6	27	1.11E-05	2442000	2.14	239.9	51.7
TA14	16	1070	380	5.07	0.4	11	1.65E-05	666900	1.89	271.3	86.1
TA14	17	740	400	5.16	0.39	8	2.10E-05	380600	2.02	152.1	55.8
TA14	18	Below LOD	Below LOD	15.8	2.1	21	1.45E-05	1448000	2.02	189	49.6
TA14	19	1000	320	13.48	0.79	26	2.25E-05	1157000	2.16	177	37.8
TA14	20	730	280	11.95	0.92	23	1.97E-05	1167000	1.84	201.4	46.4
TA14	21	1200	410	6.91	0.48	19	2.03E-05	938000	1.9	280	69.2
TA14	22	670	270	4.52	0.34	16	2.67E-05	6.00E+05	1.42	273.8	73.4
TA14	23	1010	380	15.71	0.81	27	1.87E-05	1443000	1.66	189.5	39.4
TA14	24	850	330	9.84	0.94	23	2.13E-05	1081000	1.68	226.6	53.7
TA14	25	850	290	10.8	1.5	21	1.70E-05	1238000	1.45	236.4	62.8
TA14	26	1110	370	6.64	0.39	14	1.73E-05	809000	1.57	251.3	70.4
TA14	27	940	300	14.88	0.9	26	2.18E-05	1194000	1.4	165.5	35.4
TA14	28	1000	320	13.31	0.81	18	1.92E-05	935800	1.56	145	36.4
TA14	29	880	450	5.64	0.43	9	1.64E-05	549000	1.85	200.8	69.7
TA14	30	770	380	14.86	0.8	20	1.59E-05	1259000	1.42	174.8	41.6
TA14	31	Below LOD	Below LOD	5	0.34	8	2.24E-05	357600	1.32	147.5	53.9
TA14	32	810	320	14.34	0.85	28	1.92E-05	1457000	1.64	209.6	43.4
TA14	33	Below LOD	Below LOD	6.1	0.37	14	1.80E-05	776100	1.79	262.4	73.7
TA26	1	Below LOD	Below LOD	11.1	1	55	4.17E-05	1320000	1.57	245.3	42.5
TA26	2	Below LOD	Below LOD	7.43	0.47	26	3.96E-05	656100	1.5	182.1	39.1
TA26	3	Below LOD	Below LOD	7.76	0.53	44	3.76E-05	1172000	2.48	311.5	54.9
TA26	4	Below LOD	Below LOD	15.88	0.98	44	3.29E-05	1338000	2.1	173.8	30.2
TA26	5	610	270	11.96	0.9	72	7.78E-05	925000	1.92	159.5	24.3
TA26	6	Below LOD	Below LOD	7.59	0.58	55	6.44E-05	853500	1.99	231.9	38.6
TA26	7	Below LOD	Below LOD	11.61	0.94	40	2.75E-05	1456000	1.69	258.7	48.5
TA26	8	Below LOD	Below LOD	8.75	0.69	34	4.33E-05	785600	1.56	185.2	36.7
TA26	9	Below LOD	Below LOD	6.08	0.42	24	3.96E-05	606500	1.6	205.8	46.1
TA26	10	Below LOD	Below LOD	8.1	0.42	30	3.59E-05	835000	1.8	212.6	42.4
TA26	11	Below LOD	Below LOD	13.64	0.73	38	3.07E-05	1237000	1.79	187.1	33.9
TA26	12	Below LOD	Below LOD	17	1.3	54	3.15E-05	1717000	1.67	208.3	34.9
TA26	13	Below LOD	Below LOD	9.54	0.79	29	3.71E-05	781100	1.54	168.9	35.8
TA26	14	Below LOD	Below LOD	12.03	0.9	61	5.20E-05	1172000	1.47	200.9	32.2
TA26	15	Below LOD	Below LOD	30.4	2.6	67	2.90E-05	2314000	1.6	157	25.3
TA26	17	Below LOD	Below LOD	5.79	0.37	33	5.39E-05	612100	1.45	218.1	42.5
TA26	18	Below LOD	Below LOD	8.63	0.59	37	3.73E-05	992500	1.56	237.2	44.6
TA26	19	780	240	6.76	0.39	30	3.53E-05	849300	1.64	259.1	52
TA26	20	930	410	12.06	0.93	37	2.74E-05	1351000	2.12	231.1	44.2
TA26	21	590	270	8.51	0.61	22	3.46E-05	635100	2.56	153.9	35.9
TA26	22	Below LOD	Below LOD	7.63	0.53	47	4.49E-05	1048000	1.88	283.3	48.9
TA26	23	Below LOD	Below LOD	11.46	0.68	35	2.58E-05	1359000	1.7	244.6	46.2
TA26	25	Below LOD	Below LOD	13.08	0.77	40	4.27E-05	936700	1.96	147.7	26.5
TA26	26	550	330	13.9	0.79	40	2.77E-05	1447000	1.81	214.7	38.3
TA26	27	Below LOD	Below LOD	9.61	0.6	40	3.15E-05	1270000	1.57	272.6	49.2
TA26	28	Below LOD	Below LOD	9.7	0.74	50	5.23E-05	956400	1.77	203.4	34.9
TA26	29	Below LOD	Below LOD	11.88	0.68	34	2.85E-05	1192000	1.66	207	39.5
TA26	30	Below LOD	Below LOD	8.61	0.66	64	5.00E-05	1280000	1.79	306.6	48.6
TA26	31	Below LOD	Below LOD	15.9	1.2	73	4.90E-05	1489000	1.9	193.2	29.3
TA26	32	Below LOD	Below LOD	8.29	0.58	24	2.37E-05	1014000	1.89	252.3	56.5
TA26	33	Below LOD	Below LOD	6.27	0.41	21	3.23E-05	650500	1.83	214	50.4
TA26	34	Below LOD	Below LOD	10.1	0.64	42	4.20E-05	1001000	1.8	204.4	36.3
TA26	35	Below LOD	Below LOD	10.46	0.65	27	3.71E-05	728800	2.14	143.7	30.3
TA26	36	Below LOD	Below LOD	11.2	0.73	57	6.15E-05	927200	1.66	170.8	27.2
TA26	37	Below LOD	Below LOD	11.1	0.55	82	5.39E-05	1521000	1.9	282.6	38.2
TA26	38	Below LOD	Below LOD	8.63	0.53	32	3.85E-05	830700	1.89	198.5	39
TA26	39	Below LOD	Below LOD	13.75	0.74	47	3.02E-05	1559000	1.95	233.9	39
TA26	40	Below LOD	Below LOD	6.2	0.42	43	4.90E-05	877000	1.75	291.8	51.8
TA27	1	8510	560	46.6	3	59	1.32E-05	4480000	2.97	198.3	31.2
TA27	2	6610	530	40.8	2.6	46	1.45E-05	3169000	2.71	160.2	27.5
TA27	3	7300	640	42	3.8	48	1.10E-05	4377000	2.64	215	38.9
TA27	4	8290	660	28.7	2	28	9.60E-06	2917000	2.99	209.6	44.1
TA27	5	4620	380	45.3	2.4	44	1.04E-05	4253000	2.64	193.7	33.1
TA27	6	5180	590	48.3	2.8	48	1.24E-05	3879000	2.53	165.7	27.6
TA27	7	5790	790	44.9	3.6	66	1.88E-05	3512000	2.67	161.3	25.6
TA27	8	3990	390	51.2	3.5	90	1.70E-05	5296000	2.39	213.4	29.7
TA27	9	7850	910	61.1	4.1	74	1.51E-05	4918000	2.7	166	24.4
TA27	10	5390	670	26.8	1.6	57	2.20E-05	2587000	2.52	199.1	31.3
TA27	11	4980	480	44.1	2.7	68	1.75E-05	3876000	2.99	181.3	27
TA27	12	4960	510	45.1	3.2	56	1.24E-05	4507000	2.38	206.1	33.6
TA27	13	3780	340	51.2	3.7	52	8.22E-06	6324000	2.13	254.8	42.7
TA27	14	6240	690	29.7	2	31	1.59E-05	1954000	2.58	135.7	27.3
TA27	15	7900	1300	53.4	4.5	66	1.68E-05	3923000	2.75	151.5	24.4
TA27	16	4600	540	46.8	3	56	1.21E-05	4616000	2.6	203.4	32.6
TA27	17	5730	490	48.4	3	55	1.27E-05	4326000	2.59	184.4	29.5
TA10	1	760	230	29.2	1.8	48	2.35E-05	2043000	2.23	143.1	23.9
TA10	2	no value	NaN	50.6	2.8	59	1.63E-05	3617000	2.13	146.2	22.2
TA10	3	1190	290	27.4	1.3	46	2.13E-05	2158000	1.76	161.1	26.5
TA10	4	960	250	22.7	1	72	2.94E-05	2451000	2.12	220.8	30.4
TA10	5	1680	350	34.9	1.6	31	1.20E-05	2578000	2.06	151.1	29.3
TA10	6	840	270	30.5	1.3	92	3.02E-05	3047000	2.68	204.3	25.7
TA10	7	990	270	43.1	1.7	54	2.00E-05	2707000	2.34	128.5	19.6
TA10	8	780	250	15.2	1.1	21	1.77E-05	1186000	2.23	159.6	37.8
TA10	9	860	370	28	1.2	30	1.66E-05	1813000	2.03	132.4	25.9
TA10	10	1670	310	16.3	1	40	2.46E-05	1627000	2.15	204.2	36.5
TA10	11	1320	300	20	1.2	33	1.91E-05	1732000	2.4	177.1	34.1
TA10	12	1150	320	26.9	1.6	24	2.00E-05	1199000	2.24	91.2	20
TA10	14	1090	310	12.98	0.49	27	2.04E-05	1321000	1.75	208.2	42.5
TA10	15	910	380	21.9	1.3	43	2.58E-05	1669000	1.68	155.9	27
TA10	16	930	250	39.2	1.4	50	1.85E-05	2705000	1.66	141.1	22.1
TA10	17	1780	310	20.39	0.93	25	1.77E-05	1417000	1.73	142.1	30.2
TA10	18	1300	270	9.83	0.48	31	2.76E-05	1122000	1.95	233.5	45.4
TA10	19	920	300	9.26	0.34	22	3.10E-05	710100	1.59	156.8	35.1
TA10	20	1100	240	28.03	0.83	51	1.61E-05	3165000	1.91	231	35.5
TA10	21	1070	320	15.36	0.53	37	3.38E-05	1095000	1.9	145.8	25.8
TA10	22	1560	350	18.48	0.78	37	2.06E-05	1801000	2.37	199.3	35.6
TA10	23	770	280	27.3	1.3	49	2.29E-05	2138000	2.04	160.2	25.7
TA10	24	890	260	17.67	0.91	27	1.60E-05	1686000	1.98	195.2	40.4
TA10	25	1010	300	16.5	2	44	3.86E-05	1140000	1.9	141.3	28.5
TA10	26	1210	240	9.64	0.4	20	2.34E-05	856600	2.24	181.8	42.6
TA10	27	1090	310	18.34	0.89	40	2.20E-05	1816000	2.03	202.5	35.4
TA10	28	1430	370	19.1	1	23	1.72E-05	1338000	2.37	143.3	31.8
TA10	29	700	300	13.43	0.81	12	1.63E-05	735100	1.11	112	33.6
TA10	30	1330	310	20.02	0.8	28	1.37E-05	2043000	1.72	208.7	42
TA10	31	720	350	23.95	0.83	28	1.72E-05	1626000	1.32	138.9	27.8
TA10	32	700	260	29.1	1.7	47	1.75E-05	2690000	1.78	189.1	31.5
TA10	33	1240	210	25.4	1.1	58	2.43E-05	2389000	2.21	192.4	28.7
TA10	34	1360	380	24.65	0.96	39	1.98E-05	1967000	1.73	163.2	28.4
TA10	35	1120	290	28.2	1.3	41	1.50E-05	2740000	2.06	198.7	34.2
TA10	36	820	260	34.2	2.1	33	1.58E-05	2085000	2.29	124.7	24.1
TA10	37	790	350	23.9	1.2	62	2.97E-05	2091000	2.15	178.9	26.4
TA15	1	670	320	13.14	0.46	23	1.15E-05	1995000	1.14	310.5	67.9
TA15	2	880	310	10.55	0.43	17	8.69E-06	1956000	0.98	379.2	95.7
TA15	3	820	340	3.74	0.24	10	2.85E-05	351200	1.14	192.1	62.9
TA15	4	1100	390	13.92	0.61	43	1.73E-05	2487000	1.27	365.4	61.5
TA15	5	no value	NaN	6.8	0.37	8	1.13E-05	709100	1.05	213.3	77.2
TA15	6	no value	NaN	13.9	1.2	15	2.15E-05	698400	1.18	102.8	28.6
TA15	7	Below LOD	Below LOD	3.26	0.24	8	2.43E-05	329200	1.19	206.5	75.5
TA15	8	Below LOD	Below LOD	17.4	1.3	21	6.76E-06	3105000	1.22	365	86.6
TA15	9	860	300	12.88	0.47	13	1.84E-05	705800	1.37	112.1	32
TA15	10	1100	420	11.41	0.59	20	1.70E-05	1176000	1.13	210.8	49.8
TA15	11	1750	460	38.2	1.8	55	2.14E-05	2572000	1.15	137.7	21.1
TA15	12	Below LOD	Below LOD	13.32	0.57	12	1.35E-05	890200	1.13	136.7	40.6
TA15	13	940	360	2.47	0.16	8	3.43E-05	233200	1.19	193.1	70.3
TA15	14	Below LOD	Below LOD	11.85	0.69	26	3.05E-05	851400	1.12	147	31.2
TA15	15	Below LOD	Below LOD	12.75	0.65	23	1.70E-05	1351000	1.28	216.7	48.1
TA15	18	1170	470	6.92	0.34	9	1.31E-05	688500	1.4	203.5	69.5
TA15	21	1360	430	12.61	0.97	21	1.57E-05	1336000	1.4	216.7	51.6
TA15	23	Below LOD	Below LOD	27.6	1.9	34	8.03E-06	4235000	1.29	313.8	60.6
TA15	24	Below LOD	Below LOD	57.7	3.1	58	1.22E-05	4770000	1.27	169.1	25.8
TA15	25	Below LOD	Below LOD	9.5	1	7	1.14E-05	615400	0.9	132.5	52.5
TA15	26	1610	410	18.2	1.5	8	1.29E-05	621700	0.97	69.9	25.7
TA16	1	770	290	6.06	0.34	16	3.66E-05	437000	1.35	147.5	38.7
TA16	2	1160	330	10.4	1.1	17	1.98E-05	859900	0.93	169.1	45.7
TA16	3	980	280	9.01	0.48	10	1.68E-05	595500	0.92	135.2	44
TA16	4	690	330	6.36	0.34	3	2.33E-05	128800	1.21	41.4	24.1
TA16	5	1170	280	6.61	0.43	17	1.89E-05	901700	1.44	279	71.8
TA16	7	610	250	6.12	0.31	12	2.45E-05	488900	1.06	163.4	48.8
TA16	8	660	230	7.41	0.41	10	1.93E-05	517900	1.14	143	46.6
TA16	9	1070	350	10.28	0.67	14	1.06E-05	1328000	1.21	264.2	74.2
TA16	10	no value	NaN	15.9	2	14	1.25E-05	1118000	0.74	143.8	43.2
TA16	11	1300	280	7	0.31	17	3.51E-05	484900	1.14	141.7	35.8
TA16	12	Below LOD	Below LOD	7.13	0.37	9	1.44E-05	623800	0.7	178.9	61.2
TA16	13	Below LOD	Below LOD	5.73	0.3	4	2.13E-05	187800	0.96	67	33.9
TA16	14	930	260	4.95	0.26	10	1.25E-05	802400	1.15	331.6	107.9
TA16	15	560	260	5.4	0.24	10	3.65E-05	273900	1.18	103.7	33.6
TA16	16	960	250	15.48	0.63	9	1.35E-05	666000	0.85	88	30
TA16	18	1110	320	12.89	0.99	20	1.97E-05	1015000	1.08	161.1	39.1
TA16	19	1140	270	4.9	0.27	3	2.25E-05	133600	1.09	55.8	32.5
TA16	20	Below LOD	Below LOD	11.22	0.79	16	2.29E-05	697500	1.17	127.2	33.8
TA16	21	820	320	8.05	0.52	6	1.55E-05	387400	0.82	98.4	41.1
TA16	23	700	290	12.36	0.86	18	1.56E-05	1155000	0.92	191.1	48.2
TA16	25	2260	520	5.8	0.68	11	1.77E-05	622900	0.89	219.7	72.1
TA16	27	570	230	9.18	0.46	6	1.95E-05	307500	1.09	68.5	28.4
TA16	28	510	300	15.97	0.56	10	1.13E-05	885000	1.26	113.3	36.6
TA16	29	600	180	5.6	0.25	10	2.14E-05	467900	0.97	170.9	55.4
TA16	30	500	210	5.42	0.28	6	2.48E-05	242200	0.88	91.4	38
TA16	31	Below LOD	Below LOD	5.44	0.37	6	1.69E-05	354200	1	133.2	55.6
TA16	32	Below LOD	Below LOD	4.27	0.34	5	2.73E-05	183100	1.16	87.7	40.1
TA16	34	1120	280	3.9	0.23	11	2.38E-05	463000	0.95	242.8	75.8
TA16	35	820	250	7.18	0.44	19	2.52E-05	753100	0.81	214.5	52.3
TA16	36	1690	400	4.84	0.33	8	2.46E-05	325100	1.02	137.4	50.1
TA16	38	Below LOD	Below LOD	6.27	0.43	9	1.39E-05	647400	1.16	211.2	72.8
TA16	39	710	210	7.28	0.29	7	2.32E-05	302400	1.13	85	32.6
TA17	1	500	260	14.27	0.56	42	2.51E-05	1676000	1.15	240.2	40.6
TA17	2	Below LOD	Below LOD	10.49	0.47	31	3.81E-05	814000	1.35	158.7	30.7
TA17	3	Below LOD	Below LOD	3.71	0.28	16	3.12E-05	513500	1.11	283.1	75.6
TA17	4	Below LOD	Below LOD	1.63	0.11	9	3.86E-05	233300	0.92	292.8	100.9
TA17	5	480	270	17.3	0.96	49	3.28E-05	1493000	1.13	176.5	28.8
TA17	6	790	230	13.61	0.59	48	3.18E-05	1510000	1.07	226.9	36.5
TA17	7	650	250	14.92	0.66	30	1.70E-05	1769000	0.98	242.5	47.5
TA17	8	Below LOD	Below LOD	1.8	0.14	14	5.15E-05	271800	1.07	308.9	87.7
TA17	9	510	200	34.9	1.2	47	1.72E-05	2729000	1.3	159.9	25.6
TA17	10	640	290	11.26	0.66	28	2.01E-05	1393000	1.07	253	52
TA17	11	630	290	3.78	0.18	22	5.68E-05	387400	1.15	209.6	47.3
TA17	12	Below LOD	Below LOD	12.93	0.56	25	2.79E-05	895300	0.85	141.6	30.1
TA17	13	Below LOD	Below LOD	3.29	0.2	17	4.72E-05	360300	0.82	224	57.4
TA17	14	Below LOD	Below LOD	14.79	0.47	37	4.00E-05	924700	1.15	127.9	22.6
TA17	15	760	230	17.72	0.79	31	2.43E-05	1274000	1.09	147.1	28.4
TA17	16	540	260	2.68	0.13	11	5.89E-05	186900	1.13	142.6	44.3
TA17	17	Below LOD	Below LOD	24.8	1.1	126	6.43E-05	1959000	1.33	161.6	18.5
TA17	18	780	220	11.12	0.38	58	6.35E-05	914100	1.33	168.1	24.7
TA17	19	540	250	3.35	0.23	12	4.34E-05	276400	0.96	168.8	51
TA17	21	Below LOD	Below LOD	11.63	0.49	31	3.44E-05	9.00E+05	1.19	158.3	30.5
TA17	22	520	220	9.51	0.44	41	3.76E-05	1091000	1.39	234.6	40.4
TA17	23	620	200	13.83	0.7	28	2.06E-05	1357000	1.28	200.7	40.8
TA17	25	460	180	10.98	0.33	47	5.41E-05	868500	1.01	161.8	25.7
TA17	26	550	260	3.61	0.17	13	3.97E-05	327200	1.12	185.4	53.2
TA17	27	670	280	3.78	0.25	16	3.49E-05	457900	1.04	247.8	65.6
TA17	30	850	220	12.05	0.4	30	3.69E-05	812500	1.26	137.9	26.7
TA17	31	550	330	2.42	0.13	7	4.43E-05	157900	1.03	133.5	51.5
TA17	32	Below LOD	Below LOD	3.68	0.17	15	3.88E-05	386600	1.06	214.9	57.6
TA17	33	Below LOD	Below LOD	9.74	0.36	42	2.45E-05	1717000	1.2	360.6	60.7
TA17	35	Below LOD	Below LOD	3.13	0.17	18	3.34E-05	539600	1.03	352.6	87.6
TA17	36	610	210	4.54	0.2	6	3.14E-05	190900	0.81	86	35.6
TA17	37	Below LOD	Below LOD	1.92	0.11	10	6.54E-05	152900	1.13	162.9	53.1
TA17	38	480	250	2.239	0.09	6	3.59E-05	167200	0.96	152.7	63.2
TA17	39	510	200	2.96	0.14	8	3.15E-05	254200	1.04	175.7	63.4
TA18	1	2810	450	6.39	0.42	43	0.00003711	1159000	1.52	371	65
TA18	2	2740	230	4.85	0.27	34	0.00005083	668800	1.64	282.1	53.3
TA18	3	3170	400	4.91	0.26	23	0.00001975	1164000	1.55	484.9	107.8
TA18	4	1800	270	5.09	0.22	51	0.00004187	1218000	1.66	489.4	76.8
TA18	5	2880	330	6.02	0.28	23	0.00001695	1357000	1.64	461.1	101.8
TA18	6	2950	300	5.24	0.29	28	0.0000415	674700	1.72	263.4	53.9
TA18	7	2940	300	6.11	0.32	23	0.00002266	1015000	1.81	339.8	75.5
TA18	8	2520	350	9.51	0.63	16	0.00001797	890200	1.64	191.5	50.7
TA18	9	2490	430	7.64	0.67	20	0.00002341	854500	1.75	228.8	56.4
TA18	10	3110	460	5.68	0.3	13	0.00001476	880500	1.67	317.1	91.3
TA18	11	2520	310	5.79	0.33	42	0.00004771	880300	1.63	311	54
TA18	12	2800	280	5.13	0.19	31	0.00002919	1062000	1.63	423.4	81.2
TA18	12	2640	290	5.13	0.19	31	0.00002499	1240000	1.63	494.4	94.8
TA18	13	2300	350	5.12	0.24	42	0.0000479	876700	1.6	350.2	59.8
TA18	16	3150	470	11	1	34	0.00003878	876600	1.92	163	32.9
TA18	17	3140	260	4.44	0.17	24	0.0000553	434000	1.83	199.9	43
TA18	18	1530	320	28.7	1	85	0.00002726	3118000	1.34	222.2	28.2
TA18	19	2910	290	10.14	0.52	59	0.00004506	1309000	1.71	264	39.8
TA18	20	2840	340	4.36	0.24	27	0.00005195	519700	1.77	243.8	50.7
TA18	20	2780	280	4.36	0.24	26	0.00004603	564800	1.77	265	56
TA18	21	3050	260	4.86	0.23	28	0.00004373	640200	1.84	269.4	54.6
TA18	22	2700	290	6.29	0.32	26	0.00002461	1057000	1.64	343.7	72.3
TA18	23	2300	260	12.48	0.45	19	0.00001057	1798000	1.84	294.7	70.4
TA18	24	1450	280	24	1.1	39	0.00001341	2908000	1.41	247.8	43.6
TA18	25	3230	320	5.77	0.31	22	0.0000273	805700	1.8	285.6	64.8
TA18	26	2740	390	4.22	0.37	28	0.00004253	658300	1.67	319.1	68.8
TA19	1	730	300	1.73	0.14	7	4.25E-05	164700	1.11	194.7	76.1
TA19	2	600	220	21.81	0.8	57	4.36E-05	1307000	1.18	122.6	18.2
TA19	3	930	290	35.2	2.3	37	1.20E-05	3097000	1.26	180	33.4
TA19	4	Below LOD	Below LOD	9.36	0.56	44	4.54E-05	968400	1.09	211.6	36.3
TA19	5	590	300	2.89	0.18	4	2.69E-05	148900	1.3	105.4	53.4
TA19	6	Below LOD	Below LOD	2.78	0.28	6	2.82E-05	212800	1.03	156.6	66.4
TA19	7	Below LOD	Below LOD	1.7	0.15	10	5.25E-05	190500	0.81	229.2	76.3
TA19	8	630	230	6.38	0.3	13	3.00E-05	434000	1.05	139.1	39.9
TA19	9	Below LOD	Below LOD	14.48	0.73	18	1.14E-05	1574000	1.18	222.3	55
TA19	10	Below LOD	Below LOD	7.33	0.44	18	6.00E-05	299900	0.82	83.7	20.9
TA19	11	800	440	3.16	0.23	24	5.42E-05	443000	0.75	286.7	64.2
TA19	12	Below LOD	Below LOD	4.82	0.45	10	3.94E-05	253700	1.16	107.7	36
TA19	13	1180	380	2.03	0.14	12	2.62E-05	458100	1.25	461.6	139.4
TA19	14	Below LOD	Below LOD	6.02	0.46	22	4.14E-05	532100	0.96	180.8	42.2
TA19	15	560	260	6.76	0.39	32	4.39E-05	729700	0.87	220.8	42.9
TA19	16	590	260	14.3	1.1	21	2.63E-05	799100	0.99	114.3	27.2
TA19	17	540	270	23.17	0.87	29	1.88E-05	1540000	1.08	135.9	26.9
TA19	18	530	280	23.03	0.91	35	2.77E-05	1264000	1.11	112.3	20.5
TA19	19	860	300	9.91	0.57	18	1.93E-05	932500	0.86	192.5	47.9
TA19	20	Below LOD	Below LOD	20.2	0.64	63	2.26E-05	2794000	1.07	282.9	40
TA19	21	610	250	9.06	0.4	20	2.74E-05	730400	1.15	164.9	38.7
TA19	22	630	240	33.6	2.2	65	1.99E-05	3261000	1.17	198.5	30
TA19	23	830	290	2.67	0.17	8	3.19E-05	250900	1.16	192.2	69.9
TA19	24	680	340	2.56	0.16	5	5.07E-05	98580	1.12	78.8	35.8
TA19	25	Below LOD	Below LOD	7.48	0.53	28	3.78E-05	741600	1	202.8	42.5
TA19	26	480	200	2.6	0.15	27	5.64E-05	478800	1.11	376.7	78.6
TA19	27	870	250	2.84	0.19	6	1.21E-05	496200	0.78	357.4	149.2
TA19	28	650	300	9.66	0.45	18	1.82E-05	986900	1.12	209	51.6
TA19	29	Below LOD	Below LOD	4.97	0.37	9	1.97E-05	456500	1.28	187.9	65
TA19	30	700	250	3.06	0.14	6	1.58E-05	380300	1.1	254.2	105.4
TA20	1	960	280	4.3	0.23	27	5.41E-05	499000	1.37	237.4	49.2
TA20	2	1230	300	4.54	0.25	26	3.65E-05	713200	1.46	321.3	67.9
TA20	3	890	370	4.67	0.26	32	5.71E-05	560600	1.49	245.5	47.5
TA20	4	840	230	5.32	0.27	27	3.81E-05	708800	1.5	272.5	56.4
TA20	5	1090	300	4.8	0.19	37	5.71E-05	648200	1.53	276.2	49.2
TA20	6	1270	260	4.45	0.21	41	5.84E-05	701600	1.49	322.5	55.6
TA20	7	1000	240	4.89	0.22	22	4.34E-05	507200	1.38	212.2	47.7
TA20	8	1160	210	3.41	0.18	19	5.34E-05	356000	1.45	213.5	51.7
TA20	9	1120	240	5.83	0.25	53	6.05E-05	876400	1.38	307.5	47.5
TA20	10	920	240	4.1	0.22	35	5.97E-05	586200	1.46	292.4	54.4
TA20	11	1290	310	4.74	0.3	30	5.58E-05	537200	1.57	231.8	46.6
TA20	12	1560	270	4.78	0.26	33	5.46E-05	604300	1.55	258.6	49.3
TA20	13	1610	310	4.69	0.21	22	5.56E-05	395700	1.58	172.6	38.8
TA20	14	880	240	5.25	0.25	37	6.26E-05	591400	1.47	230.4	41.5
TA20	15	1020	340	4.38	0.2	24	5.31E-05	451700	1.62	210.9	45.7
TA20	16	770	290	5.19	0.27	32	5.74E-05	557900	1.5	219.9	42.4
TA20	17	1390	230	4.42	0.21	47	8.65E-05	543600	1.5	251.6	41.1
TA20	18	1040	280	4.49	0.17	35	6.32E-05	554200	1.59	252.5	46
TA20	19	960	330	4.77	0.2	53	9.32E-05	568500	1.56	243.8	37.6
TA20	20	1170	280	5	0.22	55	7.97E-05	689700	1.39	282.1	43
TA20	21	780	290	4.46	0.22	48	5.88E-05	816600	1.6	374.5	60.9
TA20	22	840	380	5.04	0.24	46	8.81E-05	522400	1.24	212	34.9
TA20	23	1110	280	4.81	0.23	25	4.63E-05	540200	1.51	229.7	49
TA20	24	1020	270	4.83	0.2	41	6.83E-05	599900	1.3	254	43.4
TA20	25	960	260	4.64	0.21	39	6.06E-05	643700	1.27	283.8	49.8
TA20	26	1370	250	5	0.22	31	5.51E-05	562300	1.61	230	44.4
TA20	27	1510	320	4.63	0.18	27	5.53E-05	487900	1.28	215.5	44
TA20	28	1190	280	5.19	0.22	55	6.78E-05	811800	1.24	319.9	48.7
TA20	29	1330	240	4.24	0.21	42	6.06E-05	693000	1.53	334.3	57.3
TA20	30	880	200	7.93	0.33	57	6.05E-05	941800	1.44	242.9	36.4
TA20	31	1250	270	4.64	0.18	57	0.0001112	512400	1.53	225.9	33.7
TA20	32	1180	260	4.74	0.23	35	5.85E-05	598600	1.39	258.3	47.7
TA20	33	1140	220	4.35	0.19	54	9.08E-05	594500	1.3	279.5	42.9
TA20	34	910	180	4.85	0.23	48	8.16E-05	587900	1.56	247.9	40.2
TA20	35	1010	250	3.91	0.17	36	6.71E-05	536300	1.37	280.5	50.8
TA20	36	1110	240	4.72	0.22	36	6.66E-05	540500	1.39	234.2	42.6
TA20	37	1250	270	4.69	0.21	44	6.57E-05	670200	1.55	292.3	48.8
TA20	38	1350	230	4.66	0.2	47	8.30E-05	566300	1.59	248.6	40.3
TA20	39	1070	270	4.96	0.22	27	4.09E-05	659500	1.44	272	55.8
TA20	40	840	260	4.33	0.18	54	0.0001148	470300	1.57	222.2	34
TA22	1	6820	520	5.99	0.3	23	4.57E-05	503700	2.17	172	38.1
TA22	2	5780	430	4.78	0.21	19	2.30E-05	826700	1.84	353.7	85
TA22	3	5440	450	8.38	0.44	24	4.05E-05	592100	1.72	144.5	31.5
TA22	5	8650	770	5.97	0.44	19	1.93E-05	984000	1.92	337.1	83.4
TA22	6	6610	480	4.12	0.19	20	3.69E-05	541600	1.9	268.9	63.2
TA22	7	5680	520	4.88	0.22	21	4.18E-05	502300	2	210.5	48.4
TA22	8	7170	630	4.56	0.36	20	3.58E-05	558600	1.8	250.6	61.1
TA22	9	7550	730	5.77	0.33	18	2.91E-05	618700	1.94	219.3	54.6
TA22	10	6970	570	6.83	0.37	14	2.33E-05	601600	2.1	180.2	50.2
TA22	11	5980	580	5.96	0.32	18	2.32E-05	776800	1.91	266.6	66.2
TA22	12	6310	570	3.98	0.19	42	6.87E-05	611800	2.14	314.4	53.8
TA22	13	7630	540	4.38	0.2	14	2.52E-05	556000	1.95	259.6	71.9
TA22	14	6020	490	6.03	0.36	20	3.83E-05	522500	1.85	177.2	42.2
TA22	15	5800	450	5.54	0.26	19	3.32E-05	572100	2.17	211.2	50.9
TA22	16	6820	730	5.36	0.37	28	3.50E-05	800300	1.81	305.4	63.8
TA22	17	7780	530	5.2	0.23	35	4.01E-05	872400	1.93	343.2	63
TA22	18	5730	560	6.85	0.39	23	4.16E-05	553300	1.73	165.2	36.9
TA22	19	5420	520	5.33	0.31	28	3.69E-05	759700	1.73	291.5	59.9
TA22	20	5750	540	5.43	0.33	16	2.80E-05	570700	1.9	215	56.6
TA22	21	8180	750	5.52	0.33	16	2.46E-05	651300	1.8	241.3	63.5
TA22	22	5730	760	6.29	0.43	14	2.11E-05	662300	2.02	215.4	60.6
TA22	23	5460	530	4.38	0.26	11	1.85E-05	594000	1.84	277.4	86.6
TA22	24	5860	510	3.47	0.19	18	2.86E-05	628500	1.7	370.5	92
TA22	25	6010	630	2.99	0.24	10	3.37E-05	296900	1.71	203.1	67.2
TA22	26	4750	440	4.14	0.16	16	3.96E-05	403600	1.86	199.4	51.7
TA22	27	6370	570	5.61	0.27	15	1.82E-05	824800	1.98	300.7	80.8
TA22	28	4040	390	23.23	0.94	45	1.53E-05	2942000	2.09	259	42.6
TA22	29	5190	360	6.09	0.26	24	3.04E-05	790000	2.01	265.3	57.3
TA22	30	6400	480	6.17	0.22	17	2.15E-05	791400	2.18	262.4	66
TA22	31	4860	580	5	0.32	16	2.74E-05	584200	1.7	239	63.1
TA22	32	4570	490	5.8	0.29	17	1.94E-05	876600	2.16	309.1	78.5
TA22	33	4990	430	6.09	0.31	25	3.30E-05	757000	1.71	254.2	54.4
TA22	34	6090	670	5.31	0.37	29	3.10E-05	935500	1.85	360.3	74.3
TA22	35	5260	540	2.82	0.17	17	4.49E-05	379000	1.55	274.9	70.4
TA22	36	4890	470	4.37	0.26	14	2.22E-05	631700	1.8	295.7	82.6
TA22	37	6530	700	5.95	0.43	29	2.65E-05	1093000	1.74	375.7	77.8
TA22	38	6370	630	6.34	0.37	11	1.63E-05	675500	1.9	217.9	68
TA22	39	5240	530	4.08	0.19	8	3.35E-05	238800	1.65	119.7	43.2
TA22	40	6310	510	5.82	0.31	18	2.42E-05	742600	1.72	261	64.7
TA23	1	1290	730	4	0.22	11	4.22E-05	260900	1.34	133.4	41.6
TA23	2	2850	450	34.2	1.4	32	1.23E-05	2597000	1.58	155.3	29.5
TA23	3	3260	400	14.79	0.71	40	1.97E-05	2030000	1.91	280.7	49
TA23	4	1190	430	13.3	0.66	39	2.47E-05	1582000	1.46	243.3	43
TA23	5	1150	380	4.7	0.23	27	2.33E-05	1158000	1.49	503.9	104
TA23	6	2200	340	34.5	1.4	62	1.38E-05	4509000	1.38	267.3	38.7
TA23	7	1110	220	12.53	0.6	29	2.87E-05	1010000	1.49	164.9	32.9
TA23	8	2110	340	4.19	0.17	25	2.95E-05	847800	1.54	413.9	87.6
TA23	10	2080	390	17.63	0.76	52	2.12E-05	2458000	1.58	285.2	44.4
TA23	11	2550	310	13.99	0.64	63	2.79E-05	2262000	1.73	330.7	48.1
TA23	12	750	350	4.03	0.47	33	7.19E-05	459300	1.62	233.1	50.6
TA23	13	2000	500	29.6	1.6	62	1.94E-05	3193000	1.19	220.6	32.9
TA23	14	2070	430	4.83	0.33	23	3.53E-05	651200	1.79	275.8	62.5
TA23	15	1290	340	19.04	0.85	34	1.38E-05	2471000	1.16	265.4	49.3
TA23	16	1140	290	4.44	0.19	29	5.24E-05	553500	1.77	255	50.7
TA23	17	2240	400	12.44	0.61	42	2.65E-05	1585000	1.51	260.6	44.7
TA23	18	3420	360	18.13	0.72	26	1.93E-05	1349000	1.82	152.2	31.6
TA23	19	3280	490	21.8	1.6	52	2.57E-05	2026000	1.53	190.1	31.7
TA23	20	2260	580	2.8	0.17	8	3.77E-05	212000	1.4	154.9	56.2
TA23	21	2040	430	46.5	2.2	85	1.83E-05	4658000	1.56	204.9	26.8
TA23	22	3920	620	7.6	0.53	35	2.24E-05	1562000	1.66	420.4	80.4
TA23	23	1060	500	3.29	0.25	15	2.43E-05	616700	1.38	383.4	105.4
TA23	24	2680	480	8.93	0.47	29	2.18E-05	1328000	1.56	304.2	61.1
TA23	25	2670	450	2.63	0.14	14	4.01E-05	349600	1.35	271.9	75.6
TA23	27	3270	310	7.17	0.36	29	3.18E-05	913500	1.6	260.6	52.2
TA23	28	1740	340	25.48	0.99	36	1.41E-05	2561000	1.31	205.6	37
TA23	29	2050	370	32.1	1.2	45	1.59E-05	2830000	1.41	180.3	29.5
TA23	31	3450	440	6.67	0.4	11	2.61E-05	421800	1.67	129.3	40.4
TA23	32	2360	360	2.11	0.13	12	6.09E-05	197100	1.38	191.1	57.4
TA23	33	3900	480	8.49	0.43	22	1.21E-05	1817000	1.49	437.7	99
TA23	35	1790	370	40.6	2	74	1.78E-05	4148000	1.41	209	28.9
TA23	36	1210	440	3.03	0.14	22	5.14E-05	428300	1.47	289.1	65.1
TA23	37	3010	430	3.79	0.18	9	1.53E-05	588800	1.36	317.8	108.5
TA23	38	1990	390	9.97	0.43	42	2.24E-05	1875000	1.47	384.7	65.3
TA23	39	4260	380	8.05	0.35	33	3.00E-05	1102000	1.82	280	52.6
TA23	40	4800	510	21.5	1.2	36	1.60E-05	2251000	1.9	214.1	39.5
